# Supplementary material
Source: publisher figshare collection journal article supplement (https://acs.figshare.com/ndownloader/files/3877741)
Supplement: Supplementary file 1 [file 3877741]

119
2[Fe(4-tolyl)(dppe)2] LS-3c
Fe    -0.012446    -0.126688    0.023056
C    -2.757524    -1.421999    -1.743606
P    0.976024    0.273803    2.004728
C    -3.102433    -2.081241    -0.552221
H    -2.358809    -2.184680    0.224368
P    -1.082876    -0.672032    -1.872217
C    -4.403254    -2.555984    -0.347371
H    -4.657268    -3.036549    0.592090
P    0.881534    1.609780    -1.252149
C    -5.373450    -2.381235    -1.342408
H    -6.387519    -2.735002    -1.183136
P    -1.751409    1.009154    0.933024
C    -3.730729    -1.276847    -2.749032
H    -3.477072    -0.779935    -3.679590
C    -0.297278    -1.738189    -3.163825
C    -0.004106    -1.280057    -4.463588
H    -0.271467    -0.275407    -4.766864
C    0.643512    -2.108454    -5.389413
H    0.864931    -1.731571    -6.383612
C    1.000212    -3.414621    -5.034891
H    1.505844    -4.055893    -5.750608
C    0.699270    -3.888021    -3.751399
H    0.974704    -4.896732    -3.460677
C    0.059650    -3.060088    -2.824155
H    -0.138507    -3.436285    -1.829024
C    -3.083000    1.979094    0.097617
C    -3.027114    3.381453    -0.006978
H    -2.227378    3.929476    0.471476
C    -3.995939    4.086502    -0.733749
H    -3.931937    5.168796    -0.802204
C    -5.045277    3.403013    -1.359250
H    -5.794086    3.949232    -1.924717
C    -5.129973    2.008985    -1.236306
H    -5.945518    1.464647    -1.702142
C    -4.164247    1.305024    -0.511211
H    -4.255719    0.231643    -0.412794
C    -2.790468    0.031880    2.123146
C    -2.289226    -1.188943    2.600019
H    -1.325217    -1.533295    2.250241
C    -3.008337    -1.957076    3.523740
H    -2.589566    -2.891955    3.883448
C    -4.253210    -1.509602    3.982142
H    -4.820405    -2.103472    4.692605
C    -4.762091    -0.285734    3.523477
H    -5.724477    0.070121    3.879446
C    -4.034928    0.481081    2.605955
H    -4.442096    1.421328    2.250403
C    -0.183832    5.534577    -0.351832
H    -0.960428    6.233018    -0.650446
C    0.725769    5.882154    0.652460
H    0.664739    6.851790    1.136678
C    1.716878    4.963704    1.026279
H    2.433335    5.215400    1.802335
C    1.789559    3.712725    0.406775
H    2.557313    3.018143    0.717683
C    0.876111    3.344691    -0.609020
C    -0.108606    4.281309    -0.975134
H    -0.855520    4.030668    -1.717330
C    2.560158    1.497615    -2.052080
C    3.572529    2.468855    -1.977106
H    3.406341    3.387189    -1.428754
C    4.806556    2.265052    -2.610825
H    5.576218    3.028196    -2.539509
C    5.046426    1.091917    -3.335805
H    6.003534    0.936293    -3.824348
C    4.036887    0.123830    -3.434607
H    4.201887    -0.786935    -4.002136
C    2.808187    0.326490    -2.799655
H    2.036678    -0.431964    -2.880226
C    0.945879    -1.913283    0.005993
C    0.319276    -3.037441    0.611499
H    -0.639337    -2.924023    1.106449
C    0.877514    -4.320557    0.610265
H    0.347064    -5.139120    1.094396
C    2.122597    -4.566915    0.008229
C    2.773583    -3.477209    -0.586342
H    3.741585    -3.631666    -1.060811
C    2.196691    -2.199111    -0.591259
H    2.746611    -1.414433    -1.094812
C    2.724269    -5.955302    -0.012766
H    2.630118    -6.448444    0.964102
H    3.788628    -5.918076    -0.275512
H    2.224849    -6.602972    -0.749498
C    3.545196    0.672489    0.936383
H    3.154618    0.131596    0.089329
C    4.861079    1.152929    0.912894
H    5.475720    0.978283    0.036442
C    5.360494    1.876269    2.001238
H    6.375810    2.260669    1.982978
C    4.545620    2.097615    3.121996
H    4.932917    2.643827    3.977064
C    3.235499    1.608636    3.145285
H    2.626433    1.765468    4.029382
C    2.712037    0.909124    2.040739
C    1.210442    -1.126816    3.200841
C    0.381753    -1.383002    4.307117
H    -0.447114    -0.728703    4.544165
C    0.586146    -2.512816    5.111764
H    -0.067374    -2.688837    5.961357
C    1.623879    -3.405444    4.823460
H    1.779498    -4.282306    5.444831
C    2.457659    -3.161021    3.724173
H    3.257311    -3.852224    3.478013
C    2.253686    -2.035597    2.923370
H    2.889027    -1.876943    2.060525
C    -1.419793    0.915171    -2.793802
H    -1.825715    0.740211    -3.797817
H    -2.181012    1.448028    -2.218352
C    -0.111673    1.725815    -2.865086
H    -0.294713    2.767525    -3.148032
H    0.542467    1.303207    -3.633870
C    -1.025242    2.270793    2.109178
H    -0.540880    3.043924    1.506687
H    -1.812565    2.735082    2.716224
C    0.020180    1.569037    2.999150
H    -0.488263    1.074051    3.830545
H    0.709749    2.305565    3.422256
C    -5.032318    -1.748884    -2.547836
H    -5.780308    -1.620693    -3.324675
119
4[Fe(4-tolyl)(dppe)2] HS-3c
Fe    0.187687    0.155337    0.170164
C    -3.229890    0.822856    1.743389
P    1.520100    0.446880    -1.953950
C    -3.304586    1.949478    0.903457
H    -2.397024    2.351510    0.470171
P    -1.581373    0.030803    1.960718
C    -4.540547    2.525925    0.585189
H    -4.578198    3.377109    -0.087101
P    0.546833    -2.063289    0.840933
C    -5.719343    1.982492    1.111605
H    -6.681014    2.418497    0.858710
P    -1.606545    -0.291039    -1.556412
C    -4.419442    0.298336    2.282375
H    -4.380430    -0.568256    2.934385
C    -1.132620    0.386313    3.713491
C    -1.451129    -0.462078    4.792185
H    -2.017392    -1.372012    4.626647
C    -1.038808    -0.150569    6.093447
H    -1.289789    -0.818422    6.912468
C    -0.305580    1.017581    6.338025
H    0.015632    1.257644    7.347175
C    0.016118    1.869901    5.273892
H    0.591262    2.773362    5.451678
C    -0.386376    1.555868    3.970497
H    -0.100056    2.201176    3.148109
C    -3.084576    -1.385906    -1.515372
C    -3.027787    -2.710193    -1.992755
H    -2.134228    -3.076681    -2.479416
C    -4.114890    -3.577944    -1.829106
H    -4.045848    -4.596272    -2.200652
C    -5.282555    -3.135686    -1.196224
H    -6.124426    -3.809243    -1.068366
C    -5.358655    -1.813760    -0.734874
H    -6.258406    -1.452260    -0.247174
C    -4.273660    -0.946729    -0.892208
H    -4.354776    0.071501    -0.535794
C    -2.269083    1.253271    -2.310701
C    -1.553653    2.442649    -2.076884
H    -0.652753    2.417913    -1.473313
C    -1.997706    3.661154    -2.603223
H    -1.422601    4.562800    -2.416998
C    -3.174857    3.707652    -3.361417
H    -3.528853    4.652459    -3.762737
C    -3.894699    2.528174    -3.602377
H    -4.806080    2.558755    -4.192112
C    -3.442430    1.308054    -3.086596
H    -4.009138    0.401474    -3.268512
C    -0.755707    -5.218477    -1.524937
H    -1.647499    -5.833075    -1.605373
C    0.290819    -5.372218    -2.441063
H    0.221247    -6.111729    -3.232843
C    1.430743    -4.562284    -2.327433
H    2.252772    -4.668368    -3.028580
C    1.519149    -3.608501    -1.309507
H    2.405562    -2.993079    -1.236828
C    0.468683    -3.442987    -0.377653
C    -0.668588    -4.262167    -0.503978
H    -1.507361    -4.141644    0.171409
C    2.112608    -2.391250    1.758311
C    2.905849    -3.543288    1.624811
H    2.604889    -4.331430    0.944127
C    4.094172    -3.673354    2.355862
H    4.701655    -4.566193    2.239558
C    4.498881    -2.658173    3.232437
H    5.422348    -2.759138    3.794675
C    3.702929    -1.513290    3.385261
H    4.005438    -0.722824    4.065182
C    2.518387    -1.380721    2.653441
H    1.910936    -0.485369    2.755070
C    1.179671    1.826916    0.981791
C    0.579988    3.098319    0.800787
H    -0.460471    3.157558    0.478936
C    1.237377    4.310707    1.028284
H    0.719310    5.253735    0.849929
C    2.559602    4.332784    1.488081
C    3.171336    3.099618    1.732639
H    4.193149    3.081072    2.114771
C    2.500476    1.896814    1.478546
H    3.054233    0.982357    1.687178
C    3.301628    5.634274    1.676151
H    3.700912    6.003760    0.719111
H    4.149735    5.514671    2.362323
H    2.645591    6.418935    2.075617
C    3.671163    -0.803742    -0.749385
H    3.282901    -0.319466    0.136772
C    4.769382    -1.664020    -0.642420
H    5.226762    -1.826625    0.327456
C    5.236473    -2.342123    -1.775441
H    6.075739    -3.026079    -1.694932
C    4.614326    -2.137684    -3.015780
H    4.980373    -2.653354    -3.898821
C    3.523657    -1.266178    -3.123199
H    3.061255    -1.116924    -4.092785
C    3.030115    -0.598481    -1.987649
C    2.150107    2.124343    -2.355591
C    1.465600    3.029043    -3.190845
H    0.587868    2.720387    -3.744113
C    1.888454    4.359486    -3.300956
H    1.346643    5.039577    -3.952049
C    2.996237    4.811725    -2.575247
H    3.314882    5.846844    -2.651437
C    3.686226    3.919731    -1.744268
H    4.535498    4.260962    -1.161426
C    3.272400    2.590391    -1.639852
H    3.799750    1.922994    -0.970560
C    -2.020163    -1.784295    2.013652
H    -2.718463    -2.047122    2.818521
H    -2.518808    -2.003968    1.062144
C    -0.704363    -2.579223    2.153126
H    -0.872355    -3.662679    2.128870
H    -0.235926    -2.342389    3.116599
C    -0.623729    -1.036392    -2.970689
H    -0.192303    -1.976439    -2.606280
H    -1.296220    -1.264813    -3.807338
C    0.501375    -0.079497    -3.428944
H    0.047248    0.814995    -3.865381
H    1.104058    -0.553428    -4.211345
C    -5.655901    0.872756    1.968439
H    -6.567968    0.455724    2.385467
54
2[FeBr(dppe)] LS-14a�
Fe    -0.071341    -0.549033    1.115348
P    1.504387    0.043488    -0.366127
P    -1.528752    0.202384    -0.385569
C    -3.140455    -0.612524    -0.673014
C    -3.839661    -0.513726    -1.887009
H    -3.419954    0.054892    -2.712376
C    -5.069526    -1.154263    -2.046496
H    -5.603741    -1.074349    -2.989758
C    -5.608907    -1.901483    -0.994715
H    -6.565818    -2.401526    -1.119813
C    -4.912092    -2.015714    0.211083
H    -5.322003    -2.608655    1.024190
C    -3.679074    -1.379139    0.372474
H    -3.118580    -1.491112    1.298140
C    -1.906860    1.994177    -0.180983
C    -1.174053    2.706509    0.780963
H    -0.461901    2.178647    1.413089
C    -1.353342    4.083735    0.937011
H    -0.780701    4.621994    1.687677
C    -2.275094    4.760250    0.134311
H    -2.419994    5.830556    0.254868
C    -3.019292    4.056504    -0.818420
H    -3.744495    4.579152    -1.436798
C    -2.836481    2.681323    -0.974883
H    -3.428706    2.137507    -1.705490
C    2.196071    -2.660953    -0.477147
H    1.513961    -2.760051    0.365265
C    2.851790    -3.783856    -0.991552
H    2.676655    -4.759724    -0.546872
C    3.727789    -3.650073    -2.070726
H    4.236652    -4.523566    -2.470151
C    3.953828    -2.390653    -2.638685
H    4.638528    -2.284767    -3.476232
C    3.300249    -1.269667    -2.127544
H    3.487039    -0.289433    -2.559292
C    2.415404    -1.397609    -1.044189
C    2.815502    1.273254    0.022989
C    2.453979    2.621831    0.189486
H    1.424028    2.934315    0.035775
C    3.407114    3.569806    0.562782
H    3.114231    4.609824    0.681916
C    4.732479    3.183455    0.784699
H    5.474305    3.921770    1.077184
C    5.097332    1.843941    0.632594
H    6.124805    1.535283    0.806893
C    4.145740    0.893108    0.254918
H    4.438264    -0.145363    0.134917
C    -0.705098    0.199635    -2.066828
H    -0.649668    -0.845139    -2.396940
H    -1.282972    0.767784    -2.805441
C    0.702048    0.791689    -1.895289
H    0.630376    1.872211    -1.726300
H    1.324453    0.626263    -2.781899
Br    -0.392593    -2.099345    2.807110
54
4[FeBr(dppe)] HS-14a�
Fe    -0.081168    -0.670351    1.212042
P    1.513951    0.111773    -0.346942
P    -1.655212    0.176961    -0.286675
C    -3.275789    -0.592364    -0.655881
C    -3.936193    -0.449728    -1.887292
H    -3.482161    0.131237    -2.684955
C    -5.173774    -1.059660    -2.099467
H    -5.676937    -0.945067    -3.056121
C    -5.761577    -1.820108    -1.083852
H    -6.724113    -2.296467    -1.250776
C    -5.105846    -1.977168    0.139932
H    -5.553119    -2.579453    0.925955
C    -3.865440    -1.371162    0.352361
H    -3.339687    -1.513421    1.293841
C    -2.005985    1.965352    -0.024670
C    -1.244076    2.645169    0.938962
H    -0.520984    2.096248    1.540173
C    -1.405161    4.019181    1.136026
H    -0.809095    4.530923    1.886951
C    -2.338604    4.726211    0.373763
H    -2.469337    5.794207    0.526333
C    -3.112477    4.055280    -0.578563
H    -3.846908    4.601058    -1.165214
C    -2.947835    2.682922    -0.776179
H    -3.563044    2.164451    -1.506108
C    2.342241    -2.543460    -0.604918
H    1.714317    -2.717068    0.266941
C    3.033157    -3.603788    -1.200484
H    2.937602    -4.604868    -0.788948
C    3.841525    -3.376268    -2.315859
H    4.377605    -4.201822    -2.777003
C    3.965703    -2.084275    -2.841031
H    4.598855    -1.905276    -3.706257
C    3.276661    -1.025266    -2.251200
H    3.383881    -0.019248    -2.649503
C    2.459144    -1.248749    -1.130457
C    2.770651    1.398680    0.025040
C    2.356893    2.725833    0.237992
H    1.310005    2.997340    0.129502
C    3.282027    3.705998    0.599161
H    2.948591    4.729018    0.753761
C    4.630305    3.374451    0.762857
H    5.349829    4.138304    1.045168
C    5.046786    2.055884    0.565421
H    6.092543    1.789064    0.693821
C    4.124425    1.072589    0.200021
H    4.457201    0.051191    0.043784
C    -0.796996    0.221338    -1.953939
H    -0.702913    -0.817555    -2.294136
H    -1.390967    0.772356    -2.693051
C    0.587076    0.871559    -1.796419
H    0.464733    1.937560    -1.573501
H    1.172971    0.782950    -2.718773
Br    -0.028018    -2.515093    2.656038
58
2[FeBr(dpbz)] LS-14b�
Fe    0.145767    -1.231106    -1.045648
P    -1.548660    -0.286527    -0.008817
P    1.336840    0.002618    0.299305
C    -1.946026    1.409088    -0.605581
C    -1.569802    1.738739    -1.915454
H    -1.111307    0.980898    -2.547082
C    -1.749427    3.035742    -2.397954
H    -1.440445    3.283003    -3.409677
C    -2.307209    4.016340    -1.573655
H    -2.440031    5.028780    -1.945942
C    -2.682317    3.698007    -0.265108
H    -3.108264    4.461116    0.381465
C    -2.497052    2.401679    0.218640
H    -2.755674    2.165113    1.247064
C    -3.165442    -1.128953    0.204072
C    -4.385146    -0.447489    0.328861
H    -4.409327    0.635640    0.259568
C    -5.570790    -1.160327    0.524238
H    -6.512669    -0.625631    0.616524
C    -5.547176    -2.555989    0.595010
H    -6.471311    -3.108320    0.743846
C    -4.335919    -3.241374    0.462347
H    -4.314937    -4.327056    0.504025
C    -3.150752    -2.531699    0.262812
H    -2.209015    -3.062911    0.140969
C    1.579639    1.717786    -0.313666
C    0.945548    2.825136    0.264463
H    0.352411    2.701785    1.164417
C    1.051718    4.084970    -0.329297
H    0.542201    4.933506    0.118692
C    1.797223    4.250108    -1.498211
H    1.876666    5.230850    -1.960009
C    2.437738    3.149470    -2.077200
H    3.018866    3.271837    -2.987510
C    2.325024    1.888280    -1.492464
H    2.810045    1.031018    -1.953721
C    3.013669    -0.519261    0.810307
C    3.927138    0.387593    1.371786
H    3.655995    1.435974    1.465894
C    5.184756    -0.052243    1.786898
H    5.889876    0.652602    2.219934
C    5.539122    -1.397245    1.635302
H    6.521235    -1.737764    1.953179
C    4.638504    -2.299135    1.062769
H    4.919958    -3.340016    0.927872
C    3.377311    -1.863523    0.647929
H    2.683931    -2.551190    0.170010
C    -1.001643    0.051833    1.723460
C    0.390297    0.215482    1.867923
C    0.934038    0.491688    3.125315
H    2.009224    0.600626    3.236762
C    0.092329    0.600272    4.236933
H    0.515482    0.804926    5.216862
C    -1.288647    0.432023    4.094247
H    -1.936553    0.505021    4.963906
C    -1.838419    0.157552    2.837852
H    -2.909133    0.007166    2.724348
Br    1.114869    -2.823911    -2.399352
58
4[FeBr(dpbz)] HS-14b�
Fe    0.046366    -1.429412    -1.068045
P    -1.584948    -0.194063    0.057945
P    1.529040    0.020946    0.022584
C    -1.830152    1.492377    -0.621193
C    -2.269089    1.602305    -1.951322
H    -2.496551    0.704046    -2.521131
C    -2.408509    2.856582    -2.545924
H    -2.750504    2.931000    -3.574863
C    -2.097797    4.011799    -1.822589
H    -2.193661    4.988580    -2.289396
C    -1.654474    3.908299    -0.502251
H    -1.397463    4.802352    0.058602
C    -1.525094    2.655057    0.099186
H    -1.166254    2.577683    1.120539
C    -3.268207    -0.742506    0.526284
C    -4.281233    0.160422    0.884899
H    -4.081182    1.228455    0.863342
C    -5.540385    -0.313134    1.258218
H    -6.323351    0.388901    1.533224
C    -5.793847    -1.688674    1.274364
H    -6.775657    -2.055546    1.562127
C    -4.790076    -2.590937    0.910822
H    -4.989584    -3.659095    0.911802
C    -3.530650    -2.120539    0.532111
H    -2.750584    -2.815812    0.228814
C    1.643900    1.787172    -0.464972
C    1.874491    2.813069    0.464536
H    1.999616    2.568427    1.515774
C    1.918445    4.144348    0.048342
H    2.101066    4.932771    0.774129
C    1.714667    4.462743    -1.297493
H    1.737637    5.500412    -1.619975
C    1.467117    3.448254    -2.225473
H    1.290311    3.693638    -3.268850
C    1.434389    2.115648    -1.811697
H    1.229010    1.325910    -2.530187
C    3.237620    -0.505240    0.420067
C    4.246774    0.375844    0.838285
H    4.043324    1.440465    0.904240
C    5.516512    -0.112551    1.153087
H    6.295443    0.574488    1.473753
C    5.786097    -1.480825    1.050227
H    6.776055    -1.858342    1.292895
C    4.787784    -2.360255    0.622082
H    4.998980    -3.421755    0.525589
C    3.517748    -1.876319    0.301036
H    2.745648    -2.553418    -0.060148
C    -0.728322    0.075520    1.673899
C    0.688163    0.130384    1.665193
C    1.382385    0.257715    2.874674
H    2.468771    0.270114    2.866653
C    0.687821    0.355035    4.082656
H    1.236439    0.456056    5.015423
C    -0.708799    0.314122    4.090845
H    -1.251282    0.385719    5.029835
C    -1.412303    0.167187    2.893137
H    -2.496886    0.112328    2.903412
Br    0.371254    -3.508952    -2.076588
68
2[Fe(Ph)(dpbz)] LS-14c�
Fe    -0.241523    1.423885    0.118900
P    -1.093927    -0.494760    -0.466223
P    1.730446    0.397528    -0.232377
C    -1.363565    -1.605087    0.976571
C    -1.731759    -0.998869    2.188598
H    -1.889783    0.076687    2.220760
C    -1.883086    -1.771098    3.341830
H    -2.162742    -1.293007    4.276911
C    -1.665967    -3.151239    3.297155
H    -1.776362    -3.749609    4.197903
C    -1.303941    -3.761005    2.092586
H    -1.134143    -4.834234    2.053249
C    -1.153244    -2.991215    0.936978
H    -0.847170    -3.464353    0.008212
C    -2.665969    -0.595015    -1.407686
C    -3.471913    -1.743436    -1.422789
H    -3.190627    -2.607389    -0.826683
C    -4.643083    -1.769360    -2.183091
H    -5.264866    -2.661032    -2.189520
C    -5.019458    -0.646186    -2.926210
H    -5.934424    -0.665393    -3.512769
C    -4.228687    0.506097    -2.901490
H    -4.530352    1.387211    -3.461570
C    -3.058058    0.533860    -2.141065
H    -2.457952    1.438057    -2.081846
C    2.221835    -0.398340    1.354381
C    1.951076    -1.747168    1.622004
H    1.545567    -2.381935    0.842416
C    2.176670    -2.274727    2.895132
H    1.942050    -3.317282    3.091317
C    2.690069    -1.464561    3.910147
H    2.865243    -1.875463    4.900969
C    2.975059    -0.120172    3.648897
H    3.376588    0.515522    4.433840
C    2.734851    0.412180    2.381771
H    2.951660    1.459815    2.185750
C    3.310766    1.112984    -0.850249
C    4.568817    0.628735    -0.459322
H    4.630998    -0.178446    0.264948
C    5.734598    1.190328    -0.985155
H    6.704969    0.811426    -0.674456
C    5.653822    2.238250    -1.907168
H    6.561817    2.676190    -2.313506
C    4.404602    2.727563    -2.299705
H    4.338394    3.546863    -3.010809
C    3.239083    2.170279    -1.769744
H    2.265199    2.556184    -2.064624
C    0.106550    -1.444106    -1.504641
C    1.447838    -1.034723    -1.370749
C    2.451627    -1.687922    -2.093668
H    3.483929    -1.363265    -1.996676
C    2.120724    -2.737876    -2.954888
H    2.901221    -3.237508    -3.522938
C    0.787884    -3.135722    -3.098762
H    0.532001    -3.942762    -3.780509
C    -0.218833    -2.490041    -2.374964
H    -1.258127    -2.782914    -2.497260
C    -1.782245    2.507176    0.652156
C    -3.141561    2.185197    0.864521
C    -1.419617    3.850619    0.925996
C    -4.070141    3.122252    1.326962
H    -3.488924    1.173633    0.657953
C    -2.338431    4.803174    1.382168
H    -0.383201    4.172826    0.782569
C    -3.671741    4.437979    1.586993
H    -5.107791    2.829909    1.480927
H    -2.016035    5.824430    1.578767
H    -4.392748    5.170514    1.943290
68
4[Fe(Ph)(dpbz)] HS-14c�
Fe    0.040198    1.317229    -0.913728
P    1.557908    -0.267372    -0.046465
P    -1.537270    -0.127700    0.069306
C    1.654932    -1.972134    -0.724073
C    1.358666    -2.164401    -2.081125
H    1.121336    -1.306083    -2.705048
C    1.342908    -3.449693    -2.625250
H    1.097704    -3.588947    -3.674388
C    1.626943    -4.553970    -1.818176
H    1.609527    -5.555003    -2.241126
C    1.920993    -4.372445    -0.463634
H    2.134775    -5.230791    0.168332
C    1.927329    -3.088250    0.082528
H    2.125037    -2.948317    1.141701
C    3.278518    0.193365    0.397953
C    4.337613    -0.720848    0.490243
H    4.167436    -1.770536    0.271323
C    5.614051    -0.281342    0.852361
H    6.431481    -0.994953    0.917725
C    5.839560    1.070000    1.127461
H    6.833510    1.409273    1.407341
C    4.787697    1.986728    1.031767
H    4.960714    3.040364    1.234187
C    3.513925    1.553325    0.662043
H    2.699298    2.268022    0.564159
C    -1.875815    -1.759236    -0.699541
C    -1.493435    -2.972137    -0.110303
H    -1.028050    -2.972109    0.869779
C    -1.686751    -4.176586    -0.789599
H    -1.369421    -5.108359    -0.330015
C    -2.274566    -4.183241    -2.056317
H    -2.423178    -5.122032    -2.583492
C    -2.665333    -2.978047    -2.648010
H    -3.122135    -2.976404    -3.634318
C    -2.460506    -1.772082    -1.977515
H    -2.753314    -0.835371    -2.446802
C    -3.183285    0.450117    0.635397
C    -4.253818    -0.423133    0.879244
H    -4.128079    -1.488651    0.706946
C    -5.476652    0.077256    1.332359
H    -6.304376    -0.602776    1.517134
C    -5.635624    1.449980    1.546104
H    -6.588840    1.837839    1.895982
C    -4.571971    2.324159    1.302160
H    -4.695813    3.392282    1.459855
C    -3.350005    1.828359    0.843373
H    -2.524084    2.505599    0.635903
C    0.762455    -0.556229    1.598396
C    -0.652126    -0.525637    1.641573
C    -1.310371    -0.748818    2.857758
H    -2.395381    -0.709738    2.892200
C    -0.579454    -1.008045    4.019227
H    -1.099682    -1.183831    4.957160
C    0.817671    -1.029511    3.977699
H    1.386947    -1.220241    4.883776
C    1.485688    -0.797688    2.773222
H    2.571821    -0.795582    2.741262
C    0.116886    3.319676    -1.218688
C    1.341293    4.016400    -1.356596
C    -1.050187    4.114416    -1.320233
C    1.403518    5.398204    -1.570751
H    2.280247    3.466297    -1.295597
C    -1.006183    5.496789    -1.534834
H    -2.028991    3.643057    -1.229981
C    0.225651    6.145330    -1.658582
H    2.368926    5.892652    -1.668813
H    -1.930581    6.068379    -1.604592
H    0.267155    7.220287    -1.822142
68
2[Fe(Ph)(dpbz)] LS-14c��
Fe    -0.215364    1.293151    0.427106
P    -1.319606    -0.372446    -0.331533
P    1.577406    0.197402    -0.235907
C    -1.504366    -1.729462    0.905241
C    -1.549226    -1.362177    2.258592
H    -1.532939    -0.306804    2.522363
C    -1.593586    -2.339291    3.254705
H    -1.619643    -2.043287    4.300113
C    -1.590748    -3.693575    2.908993
H    -1.616128    -4.454198    3.685061
C    -1.548786    -4.068113    1.562841
H    -1.542640    -5.120263    1.288845
C    -1.504538    -3.090646    0.565950
H    -1.437375    -3.386172    -0.477389
C    -2.998648    -0.191266    -1.054282
C    -3.880812    -1.271716    -1.209129
H    -3.593945    -2.257435    -0.853917
C    -5.133458    -1.079983    -1.795748
H    -5.811810    -1.921692    -1.910462
C    -5.517178    0.194207    -2.225437
H    -6.494363    0.343527    -2.677610
C    -4.649480    1.277045    -2.059353
H    -4.951614    2.271888    -2.376381
C    -3.396079    1.086803    -1.472381
H    -2.727959    1.927321    -1.306350
C    2.285213    -0.943289    1.028628
C    1.840650    -2.268577    1.136666
H    1.162279    -2.674036    0.394708
C    2.245867    -3.066722    2.208448
H    1.876449    -4.085783    2.284996
C    3.111684    -2.554633    3.177369
H    3.428077    -3.175893    4.011283
C    3.569694    -1.237093    3.071629
H    4.246869    -0.832999    3.819969
C    3.153170    -0.434107    2.009057
H    3.508243    0.590963    1.934172
C    3.073943    1.005635    -0.943151
C    4.340023    0.399664    -0.958969
H    4.472651    -0.574739    -0.497354
C    5.426995    1.051511    -1.545469
H    6.404628    0.576064    -1.550109
C    5.258821    2.314181    -2.122559
H    6.106169    2.821586    -2.576452
C    4.002356    2.926043    -2.107951
H    3.869532    3.910452    -2.549228
C    2.916593    2.275720    -1.517092
H    1.937903    2.751354    -1.494091
C    -0.336460    -1.201942    -1.663263
C    1.048919    -0.955871    -1.591331
C    1.910003    -1.546620    -2.521498
H    2.976598    -1.345386    -2.473135
C    1.394574    -2.370633    -3.525982
H    2.064949    -2.820305    -4.253987
C    0.018168    -2.603697    -3.606001
H    -0.381409    -3.232420    -4.397686
C    -0.847666    -2.020798    -2.675879
H    -1.919469    -2.186080    -2.745781
C    -1.482539    2.529400    1.080386
C    -2.730723    3.118593    1.323604
C    -0.335401    3.261335    1.406953
C    -2.796457    4.400140    1.883882
H    -3.650654    2.592164    1.071651
C    -0.371174    4.543663    1.961457
H    0.676711    2.801595    1.222518
C    -1.628166    5.110015    2.200995
H    -3.765271    4.858713    2.074360
H    0.539342    5.088181    2.203696
H    -1.699802    6.104965    2.633535
